# Supplementary material for: HMGB1 facilitates repair of mitochondrial DNA damage and extends the lifespan of mutant ataxin-1 knock-in mice
Source: PubMed Central journal article supplement (PMC4309669; doi:10.15252/emmm.201404392), 2014-12-15
Supplement: emmm0007-0078-sd24.pdf [file emmm0007-0078-sd24.pdf]

Supplementary source data: original scans of gels

Fig. 2A

Nuclear cytosolic

Mitochondrial

HMGB1

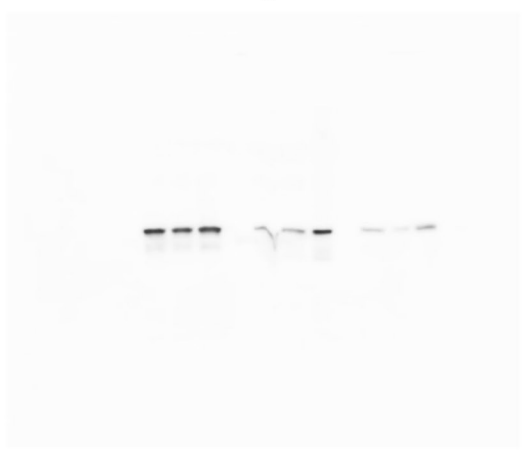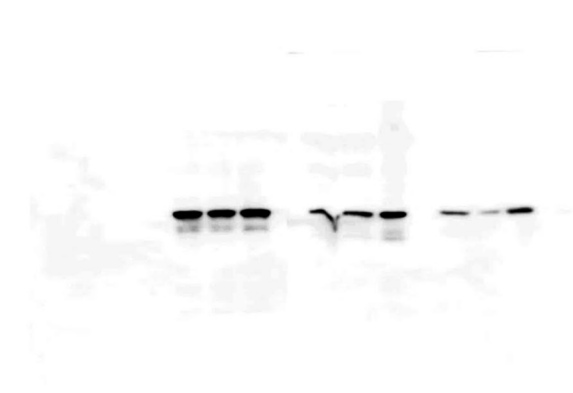

Nuclear cytosolic

HP1 $\alpha$

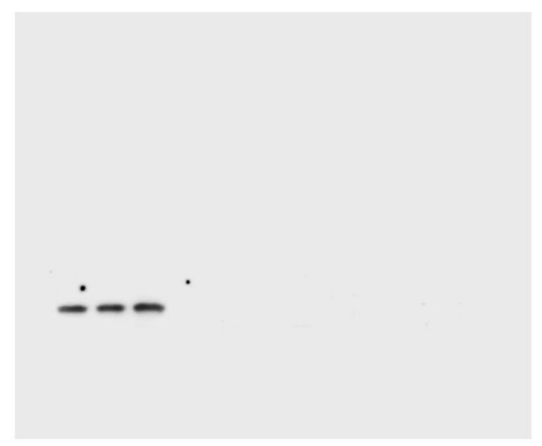

$\alpha$ -tubulin

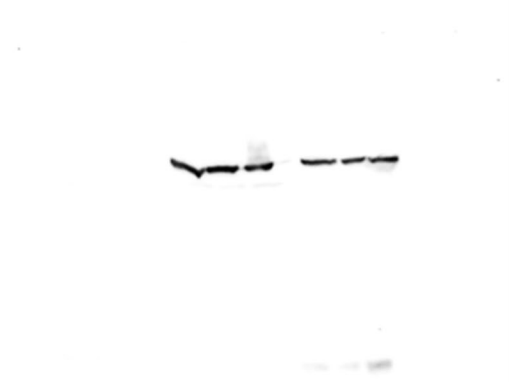

Mitochondrial

Mitochondrial with marker

$\alpha$ -tubulin

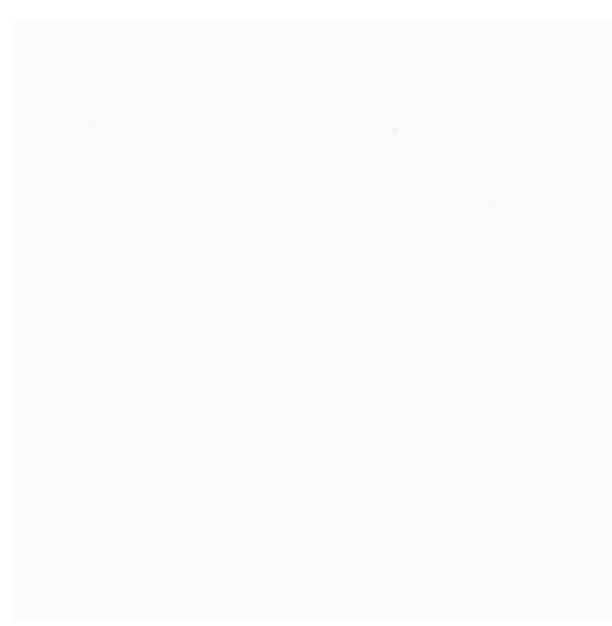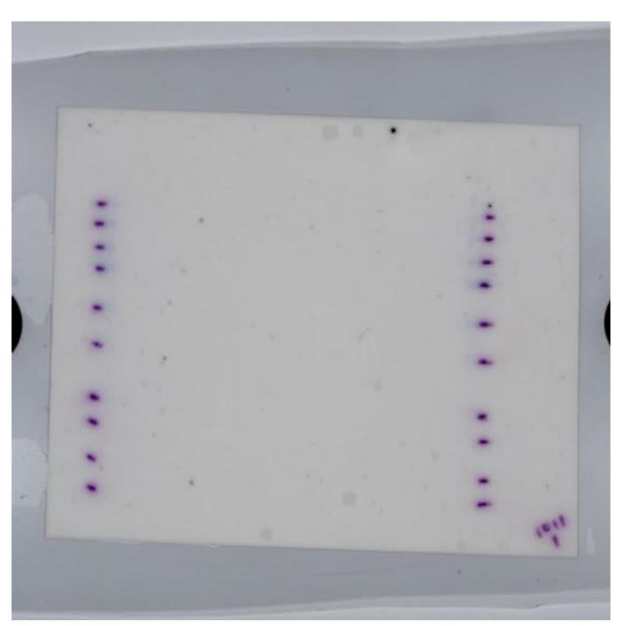

Supplementary source data: original scans of gels

Fig. 2A

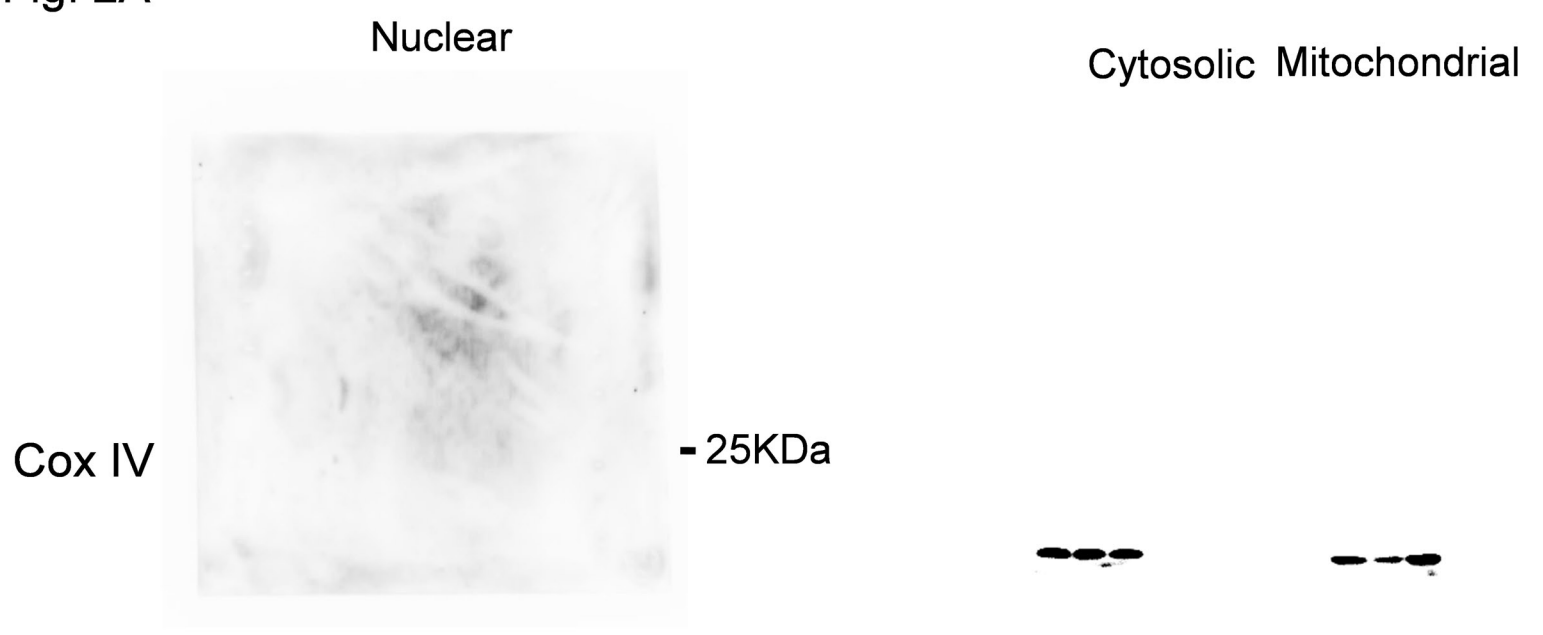

Fig. 2C

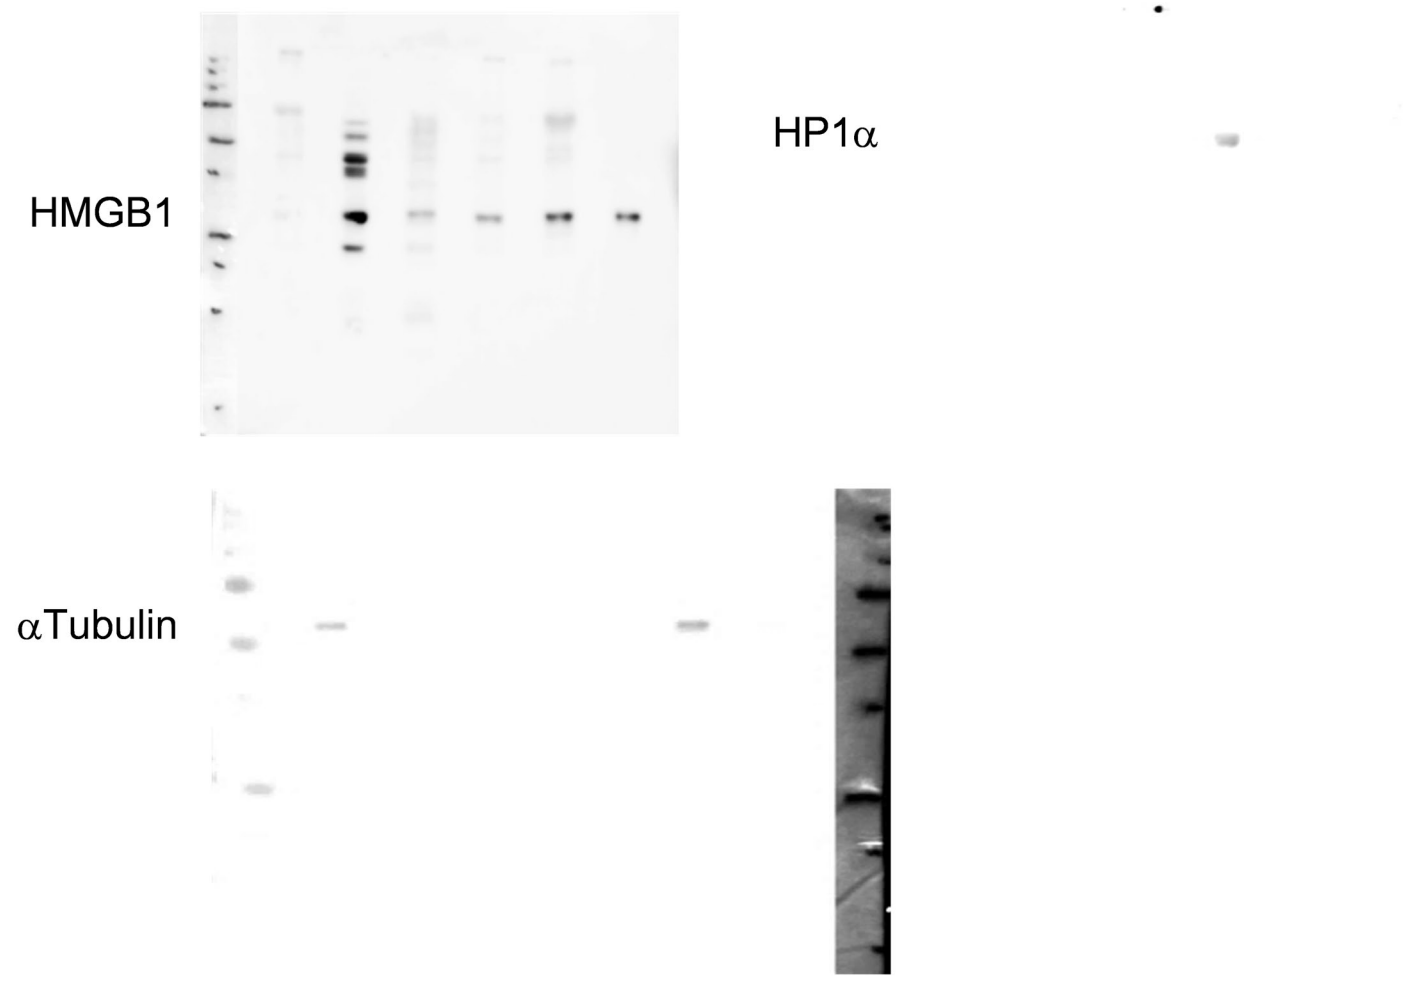

Supplementary source data: original scans of gels

Fig. 2C

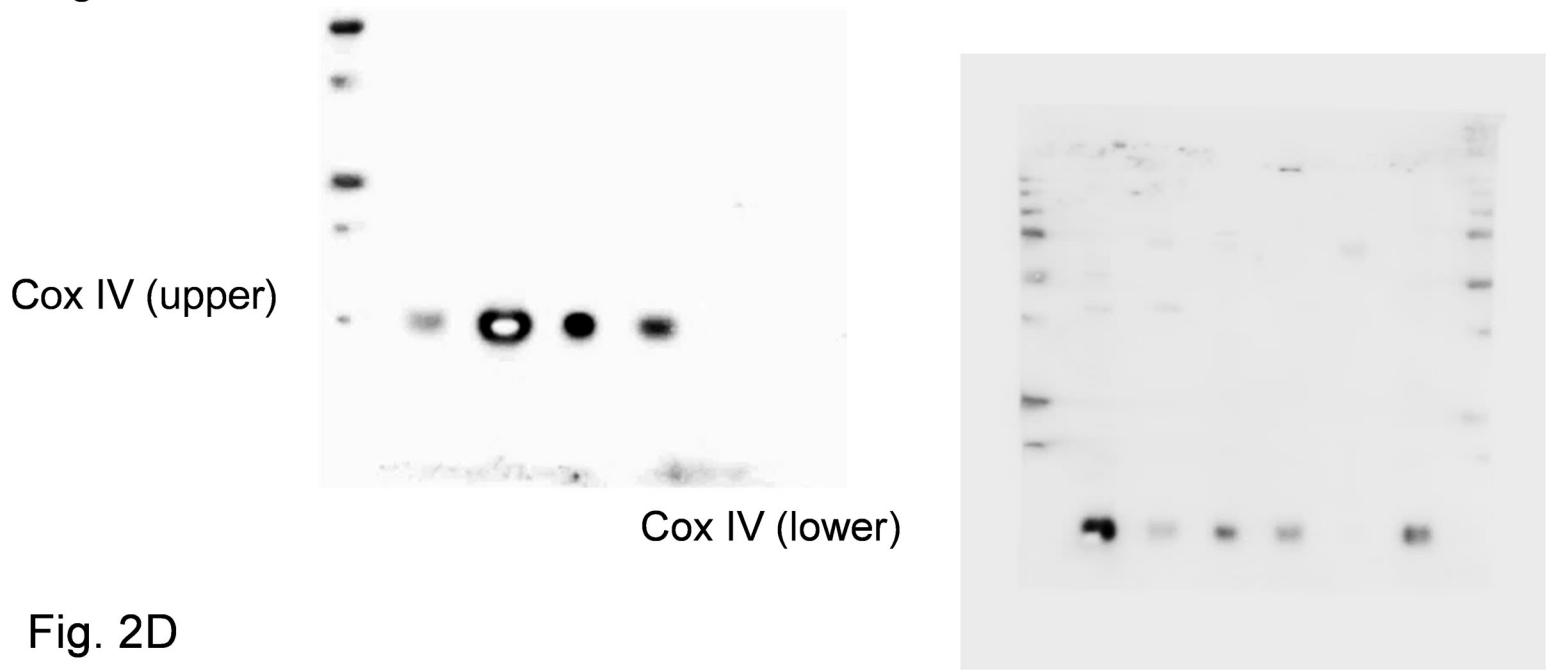

Fig. 2D

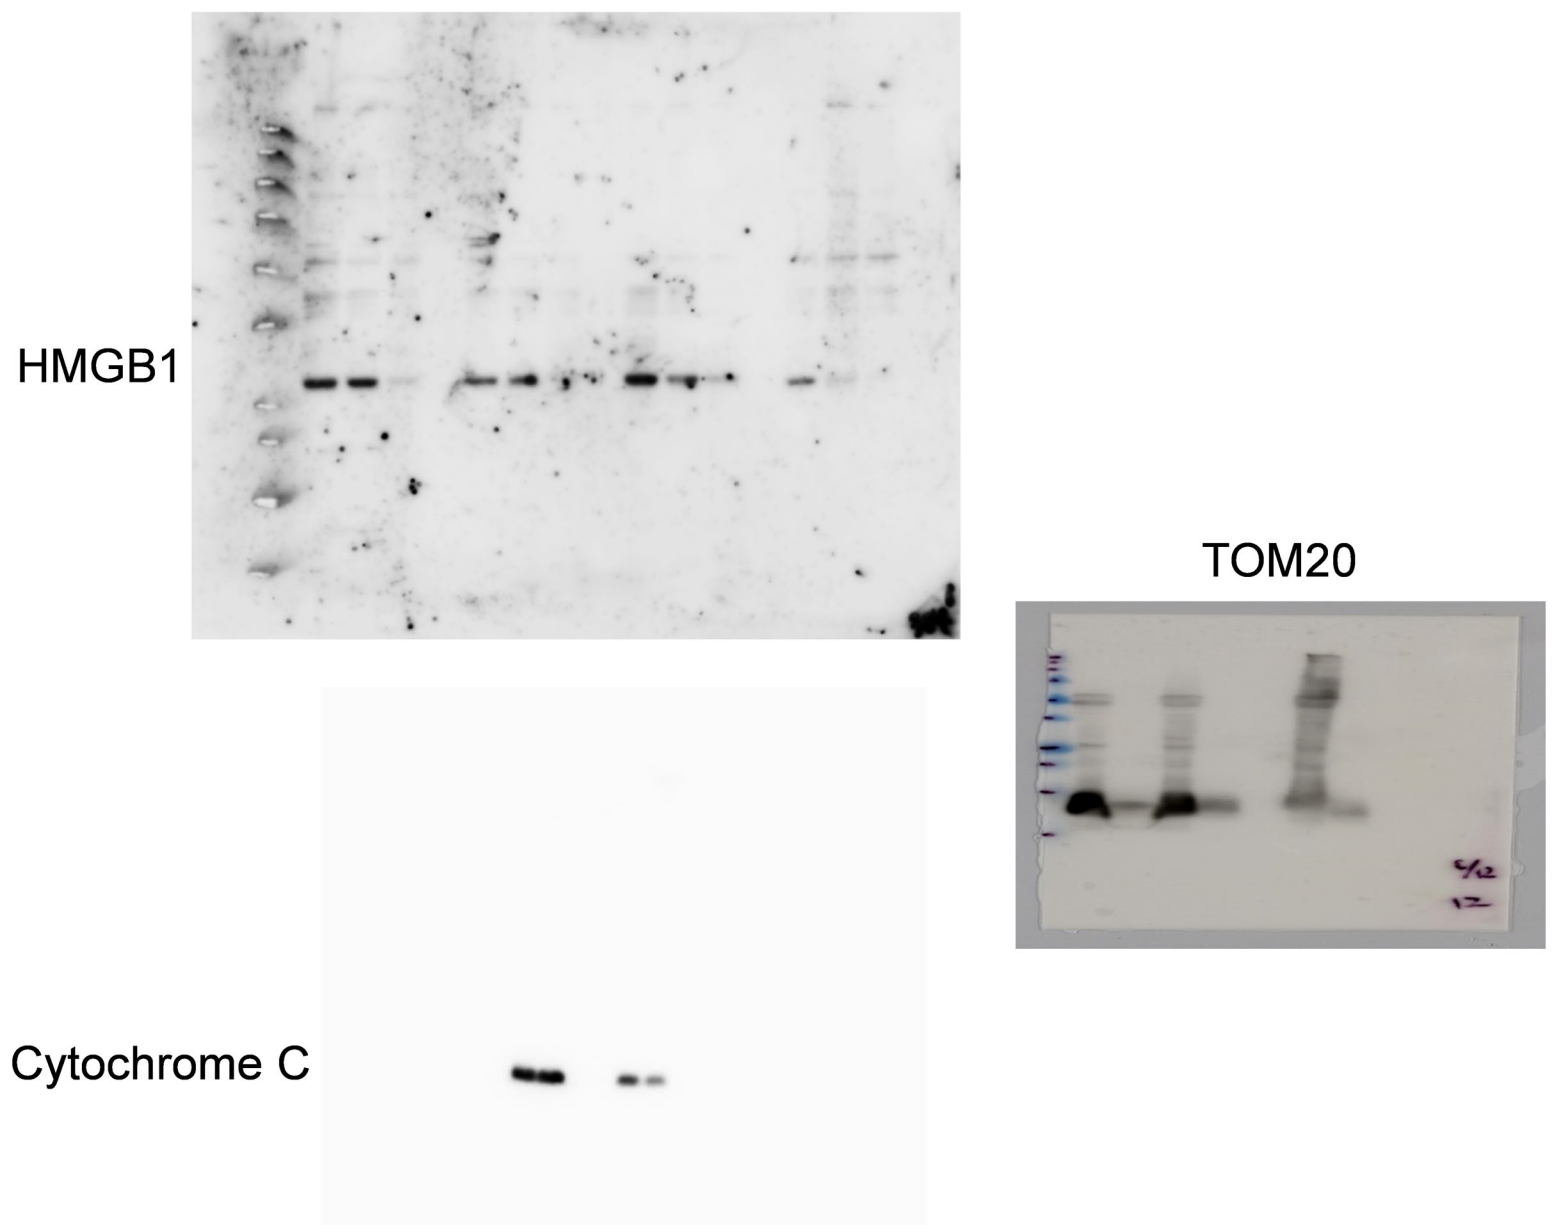

Fig. 2D

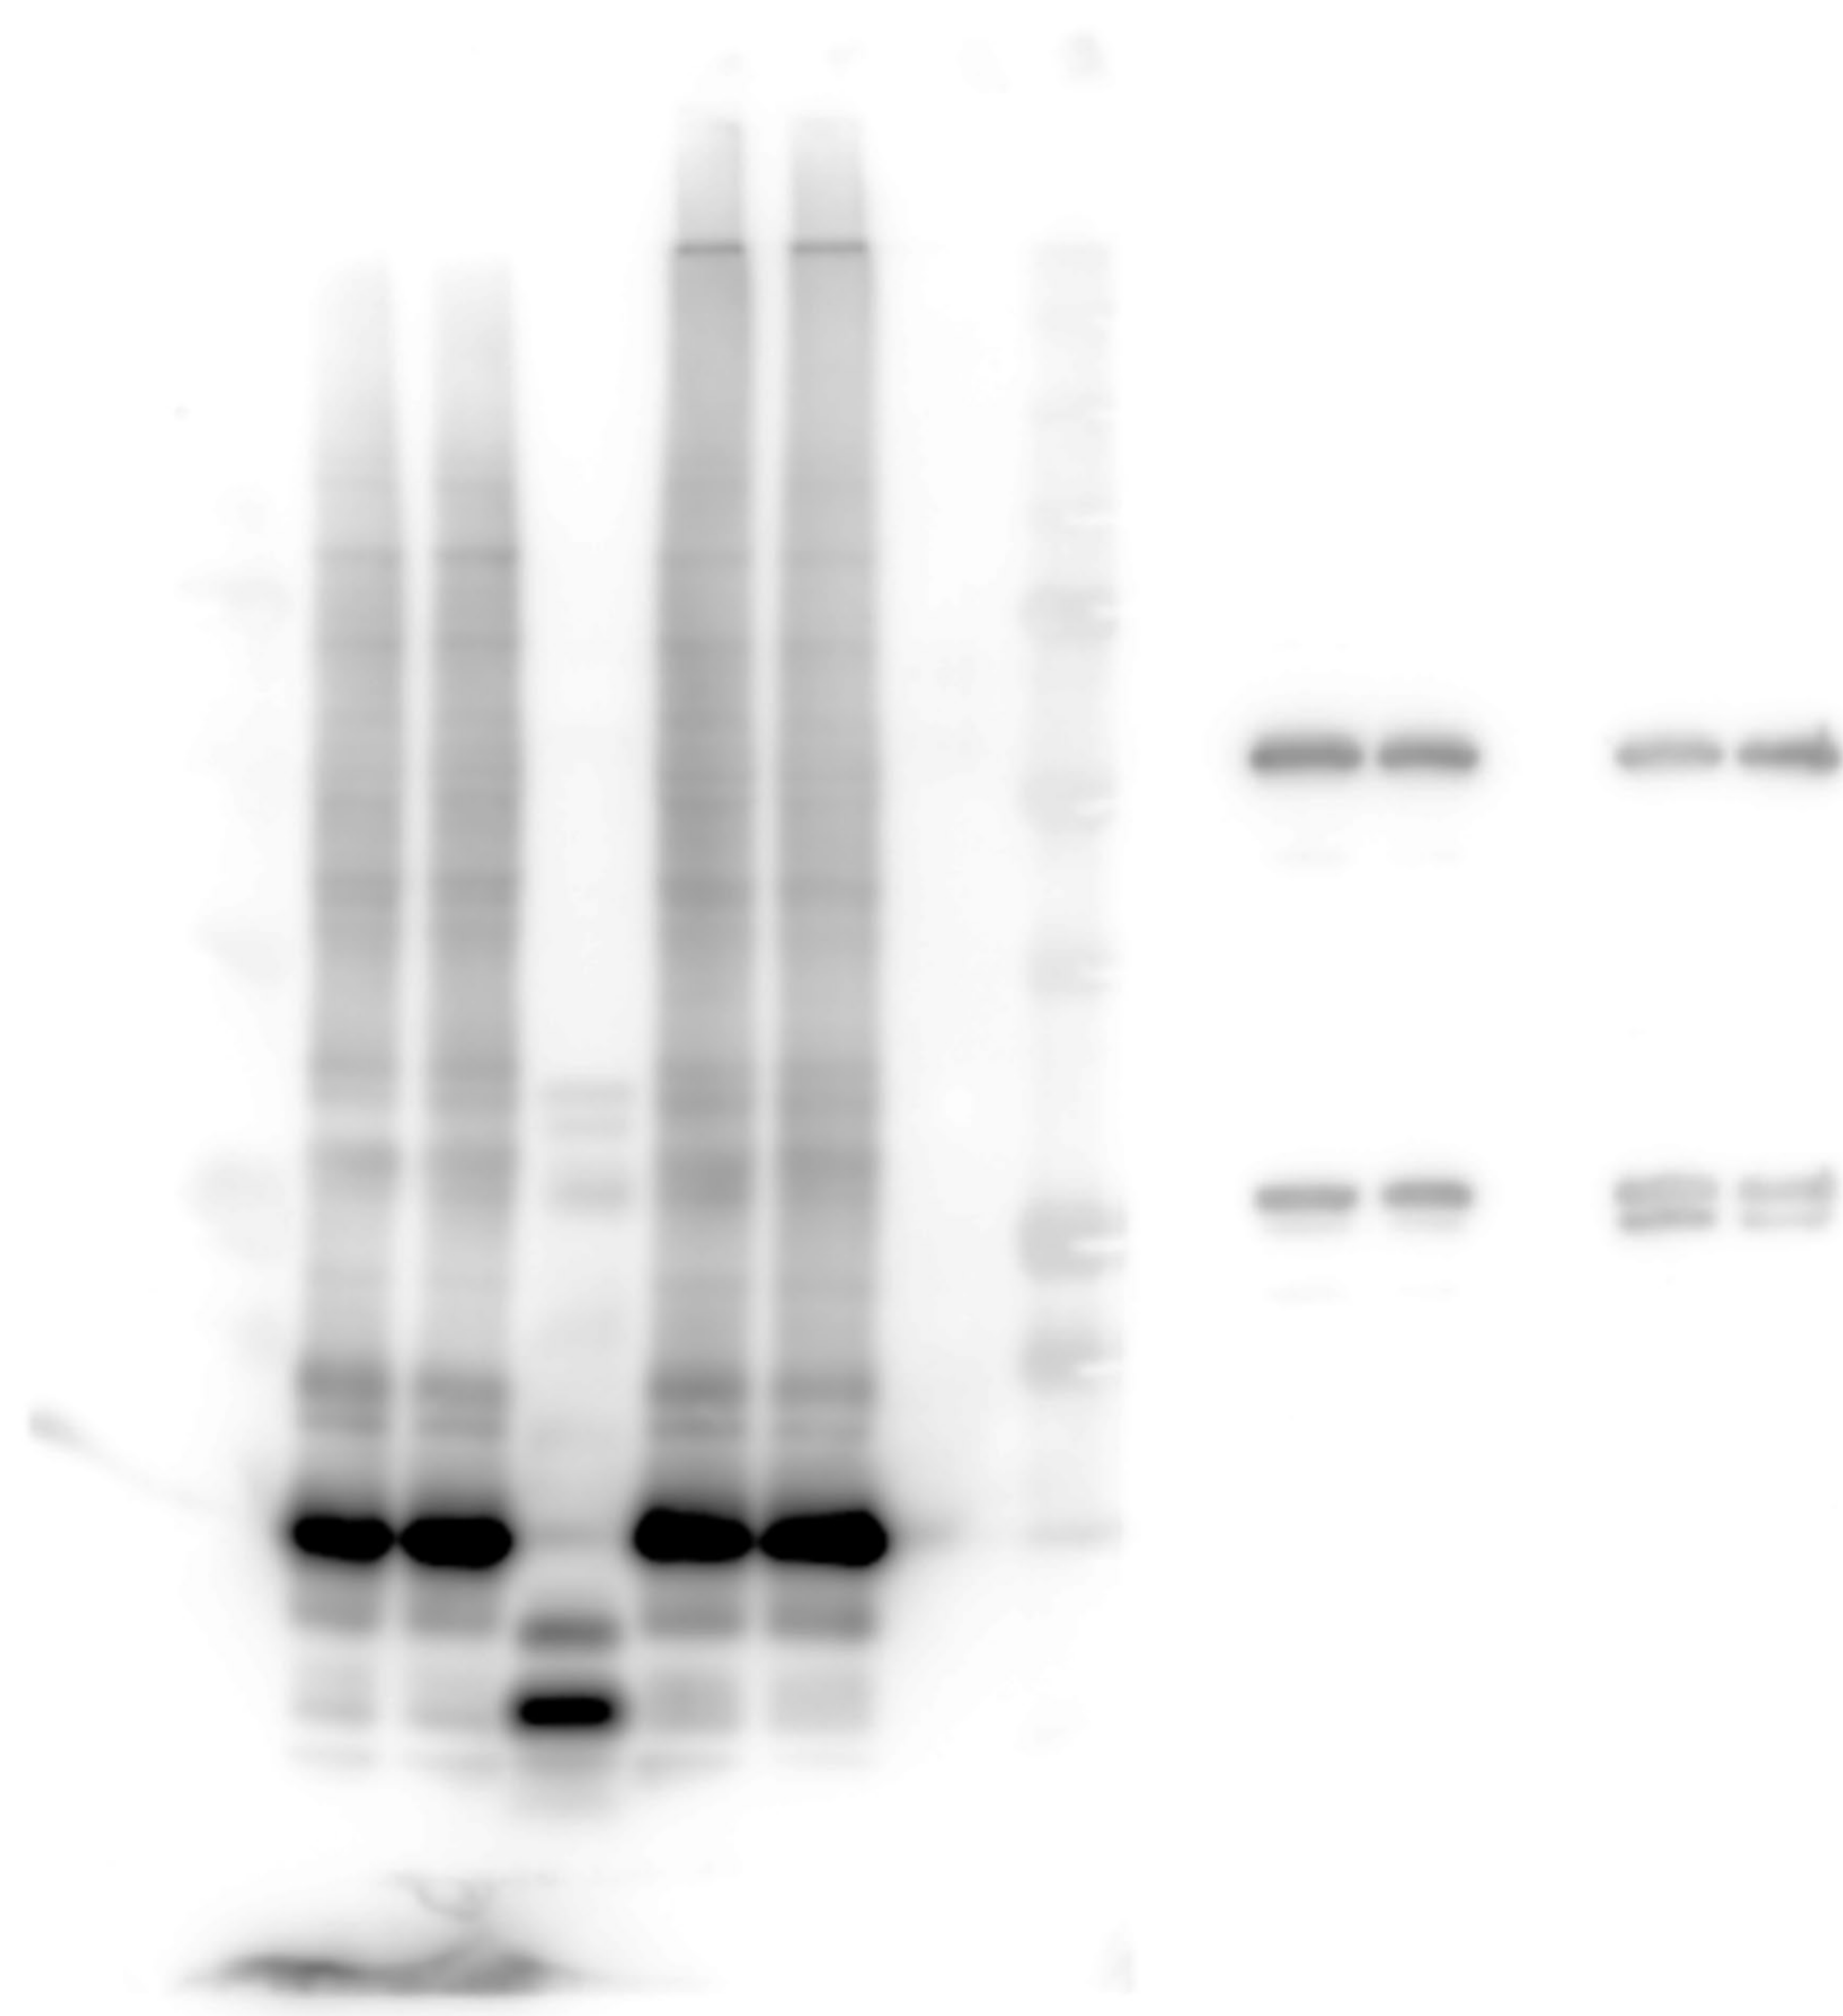

Cox IV

TFAM
