# Supplementary material for: HMGB1 facilitates repair of mitochondrial DNA damage and extends the lifespan of mutant ataxin-1 knock-in mice
Source: PubMed Central journal article supplement (PMC4309669; doi:10.15252/emmm.201404392), 2014-12-15

# Supplementary source data: original scans of gels

Fig. 4A

long fragment

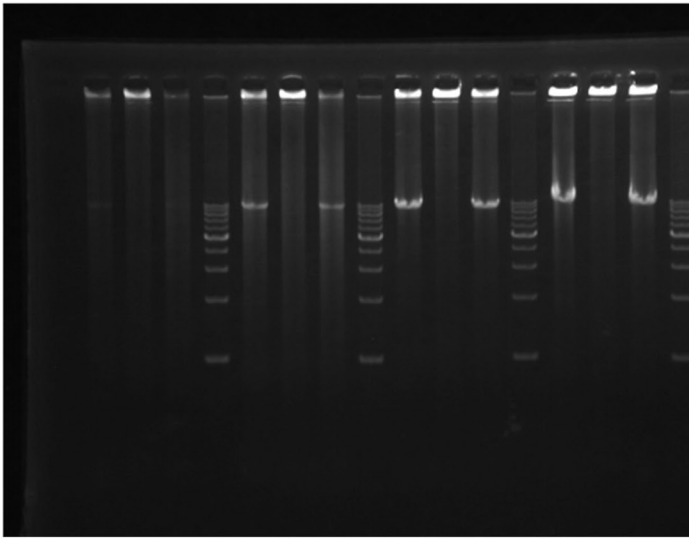

short fragment

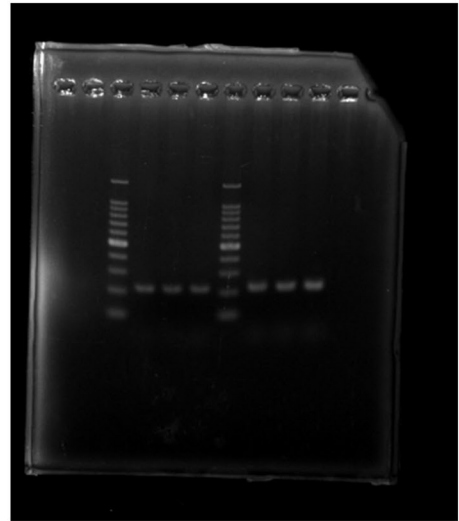

Fig. 4C

1C2

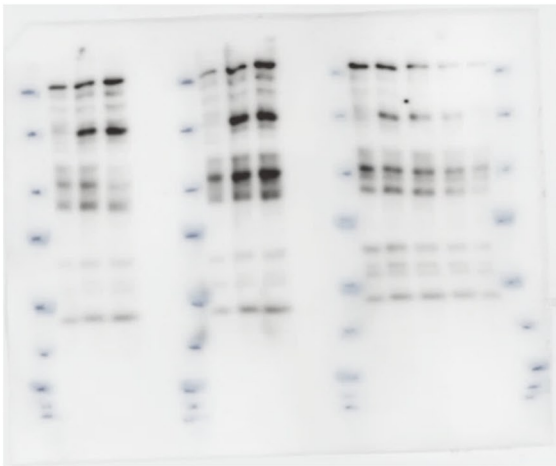

GAPDH

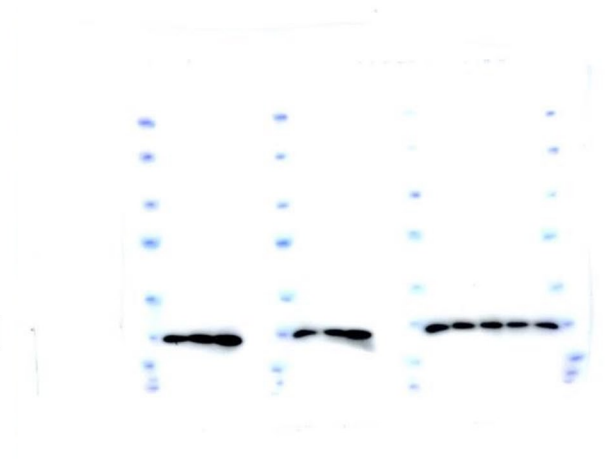

HMGB1

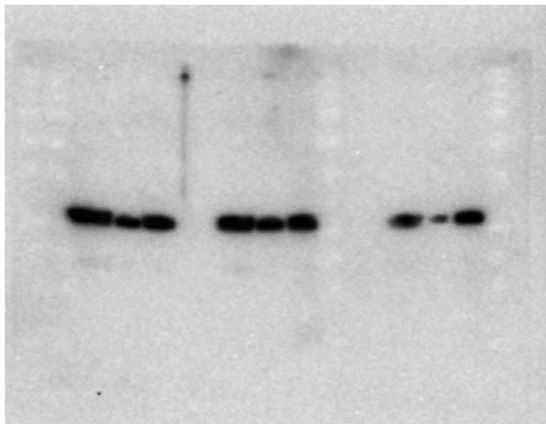

Supplement: emmm0007-0078-sd26.pdf [file emmm0007-0078-sd26.pdf]
