# Supplementary material for: HMGB1 facilitates repair of mitochondrial DNA damage and extends the lifespan of mutant ataxin-1 knock-in mice
Source: PubMed Central journal article supplement (PMC4309669; doi:10.15252/emmm.201404392), 2014-12-15

Fig. 6B

Atxn-1 (H-21)

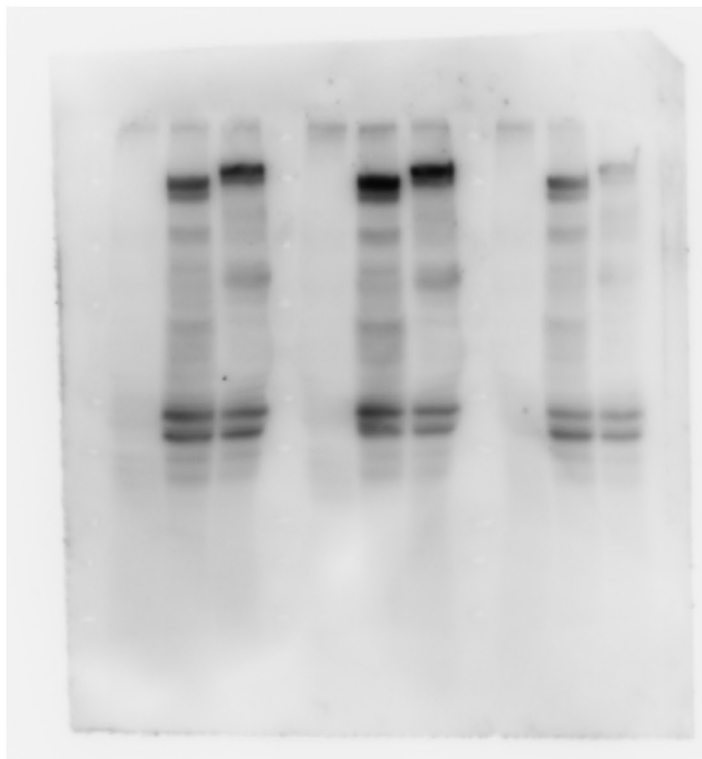

GAPDH

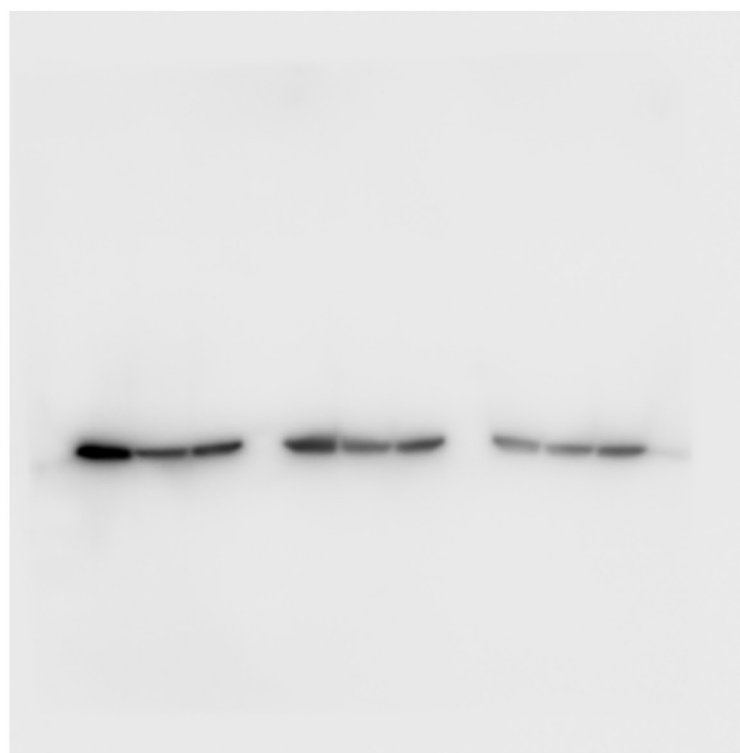

Supplement: emmm0007-0078-sd28.pdf [file emmm0007-0078-sd28.pdf]
