# Supplementary material for: HMGB1 facilitates repair of mitochondrial DNA damage and extends the lifespan of mutant ataxin-1 knock-in mice
Source: PubMed Central journal article supplement (PMC4309669; doi:10.15252/emmm.201404392), 2014-12-15

Supplementary source data: original scans of gels

Fig. 7A

long fragment

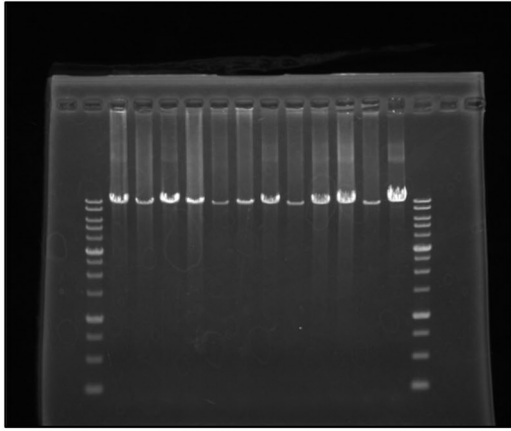

short fragment

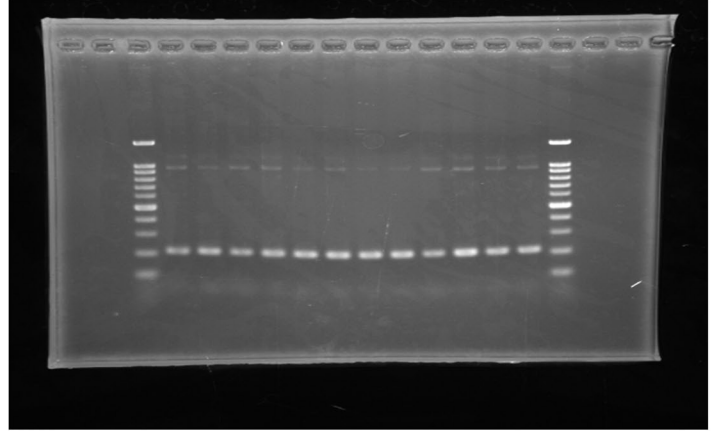

Fig. 7B

long fragment

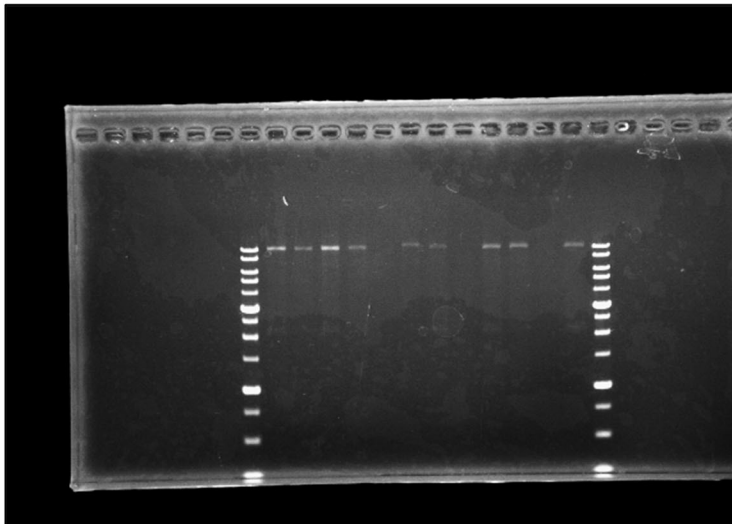

short fragment

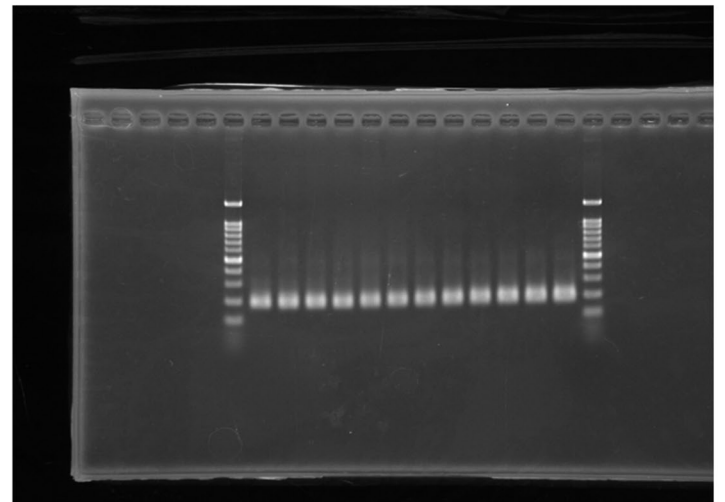

Fig. 7G

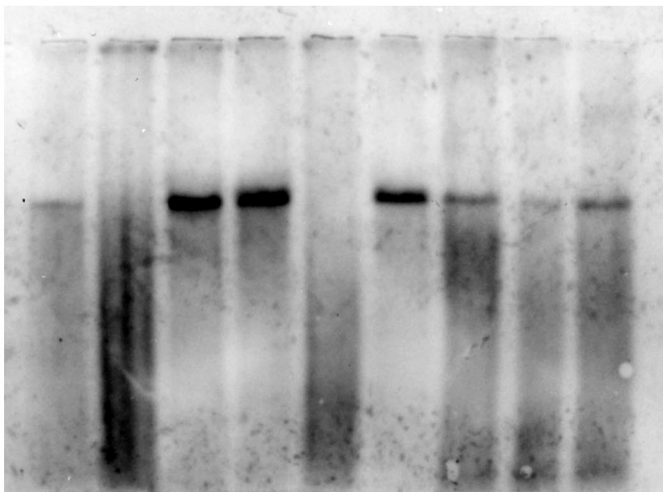

Supplement: emmm0007-0078-sd29.pdf [file emmm0007-0078-sd29.pdf]
